# Supplementary material
Source: publisher site journal article supplement (https://www.dovepress.com/get_supplementary_file.php?f=469984.docx)

**Supplemental Figure 1. Individual PA trajectories over the course of the study.** Shown are the levels of PA for each patient during study participation (approx. one year). Patients are coded as PA001-PA042. *Abbreviations used:* PA, physical activity.

**
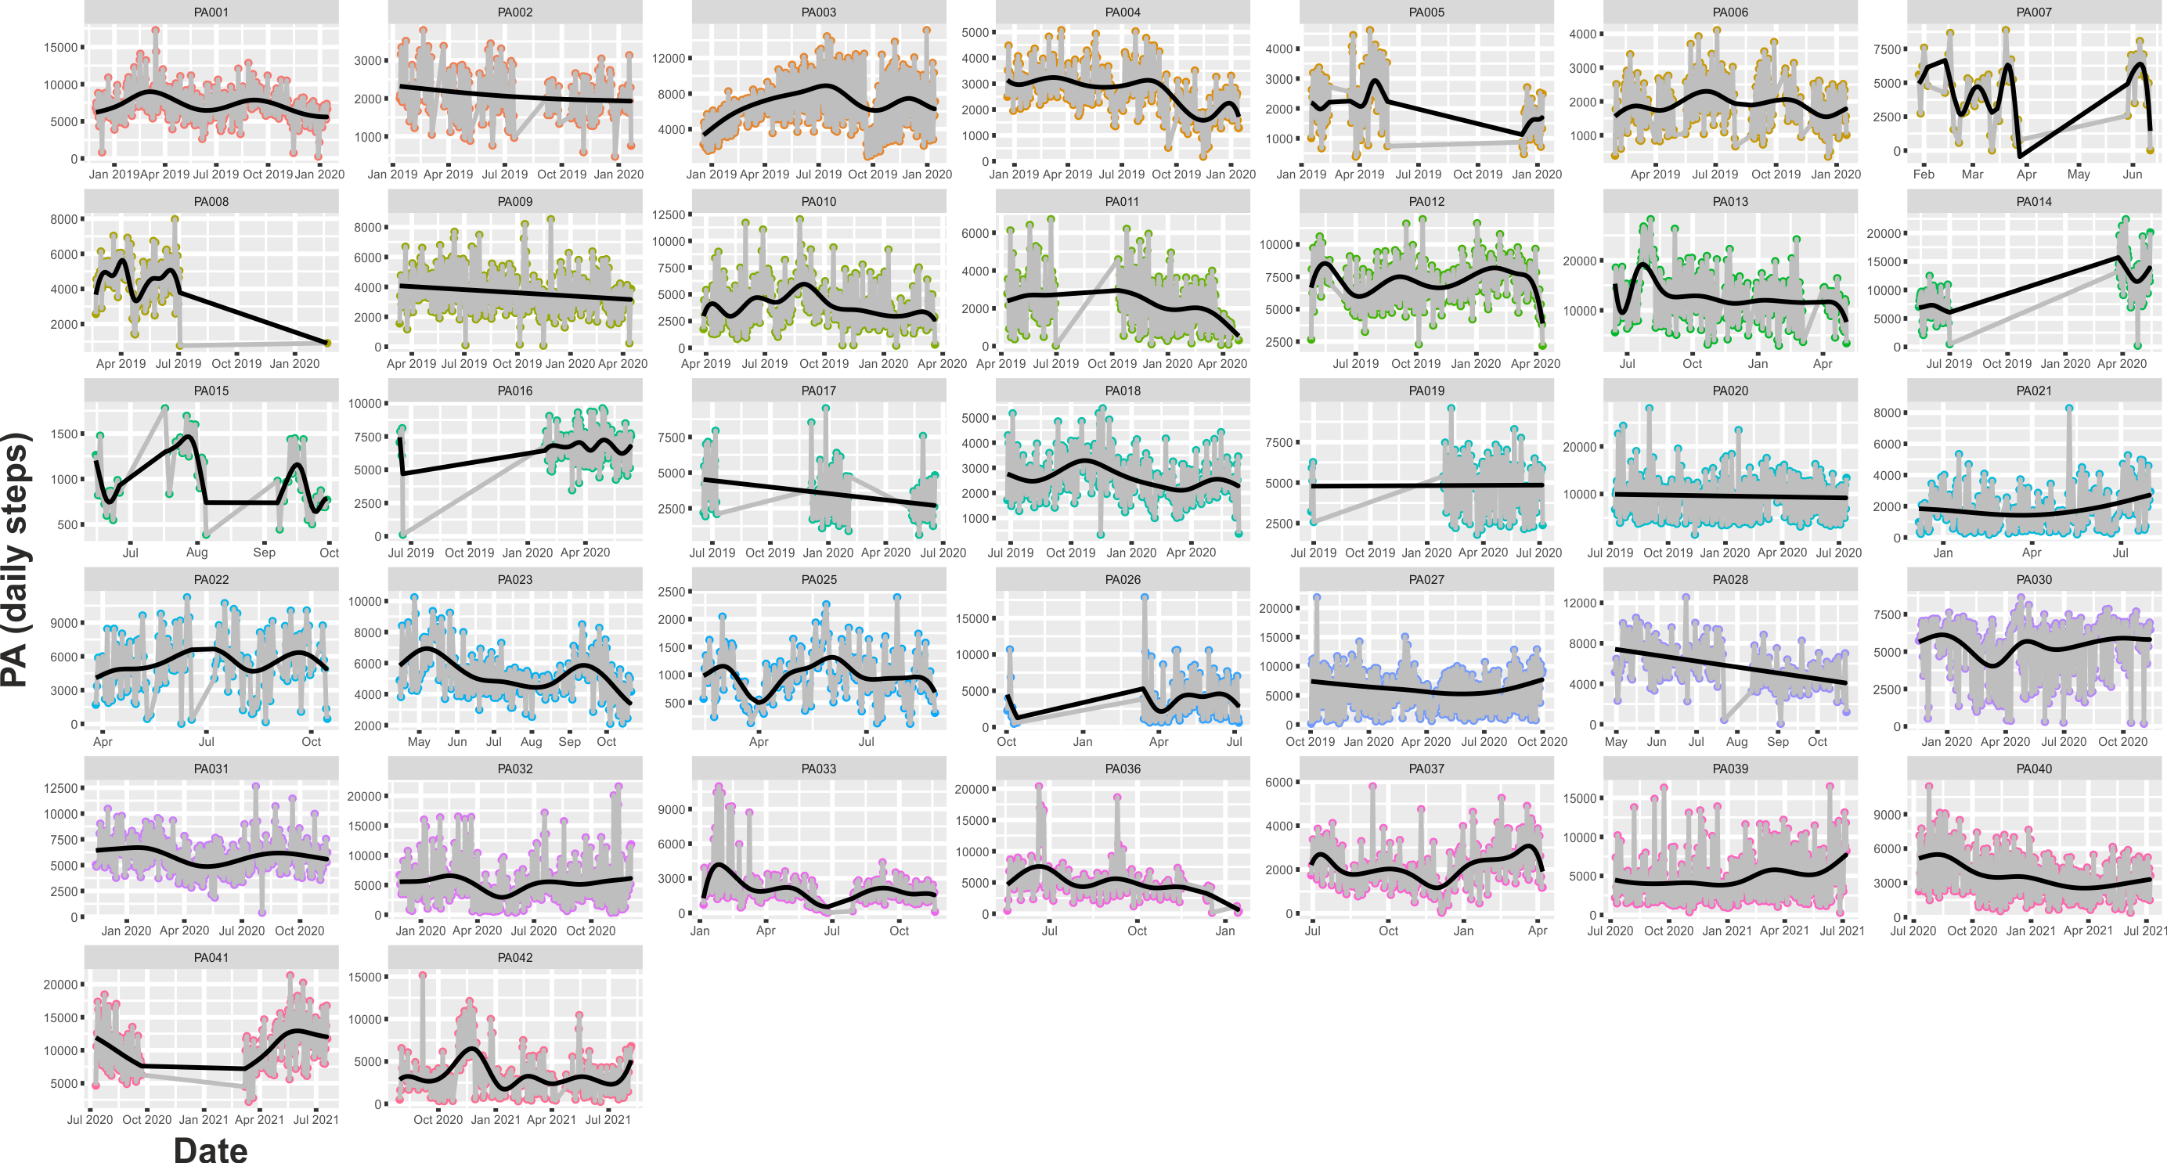
**

**Supplemental Figure 2. Individual CAT score trajectories over the course of the study.** Shown are the CAT score changes of each patient during study participation (approx. one year). Patients are coded as PA001-PA042. *Abbreviations used:* CAT, COPD assessment test; COPD, chronic obstructive pulmonary disease.


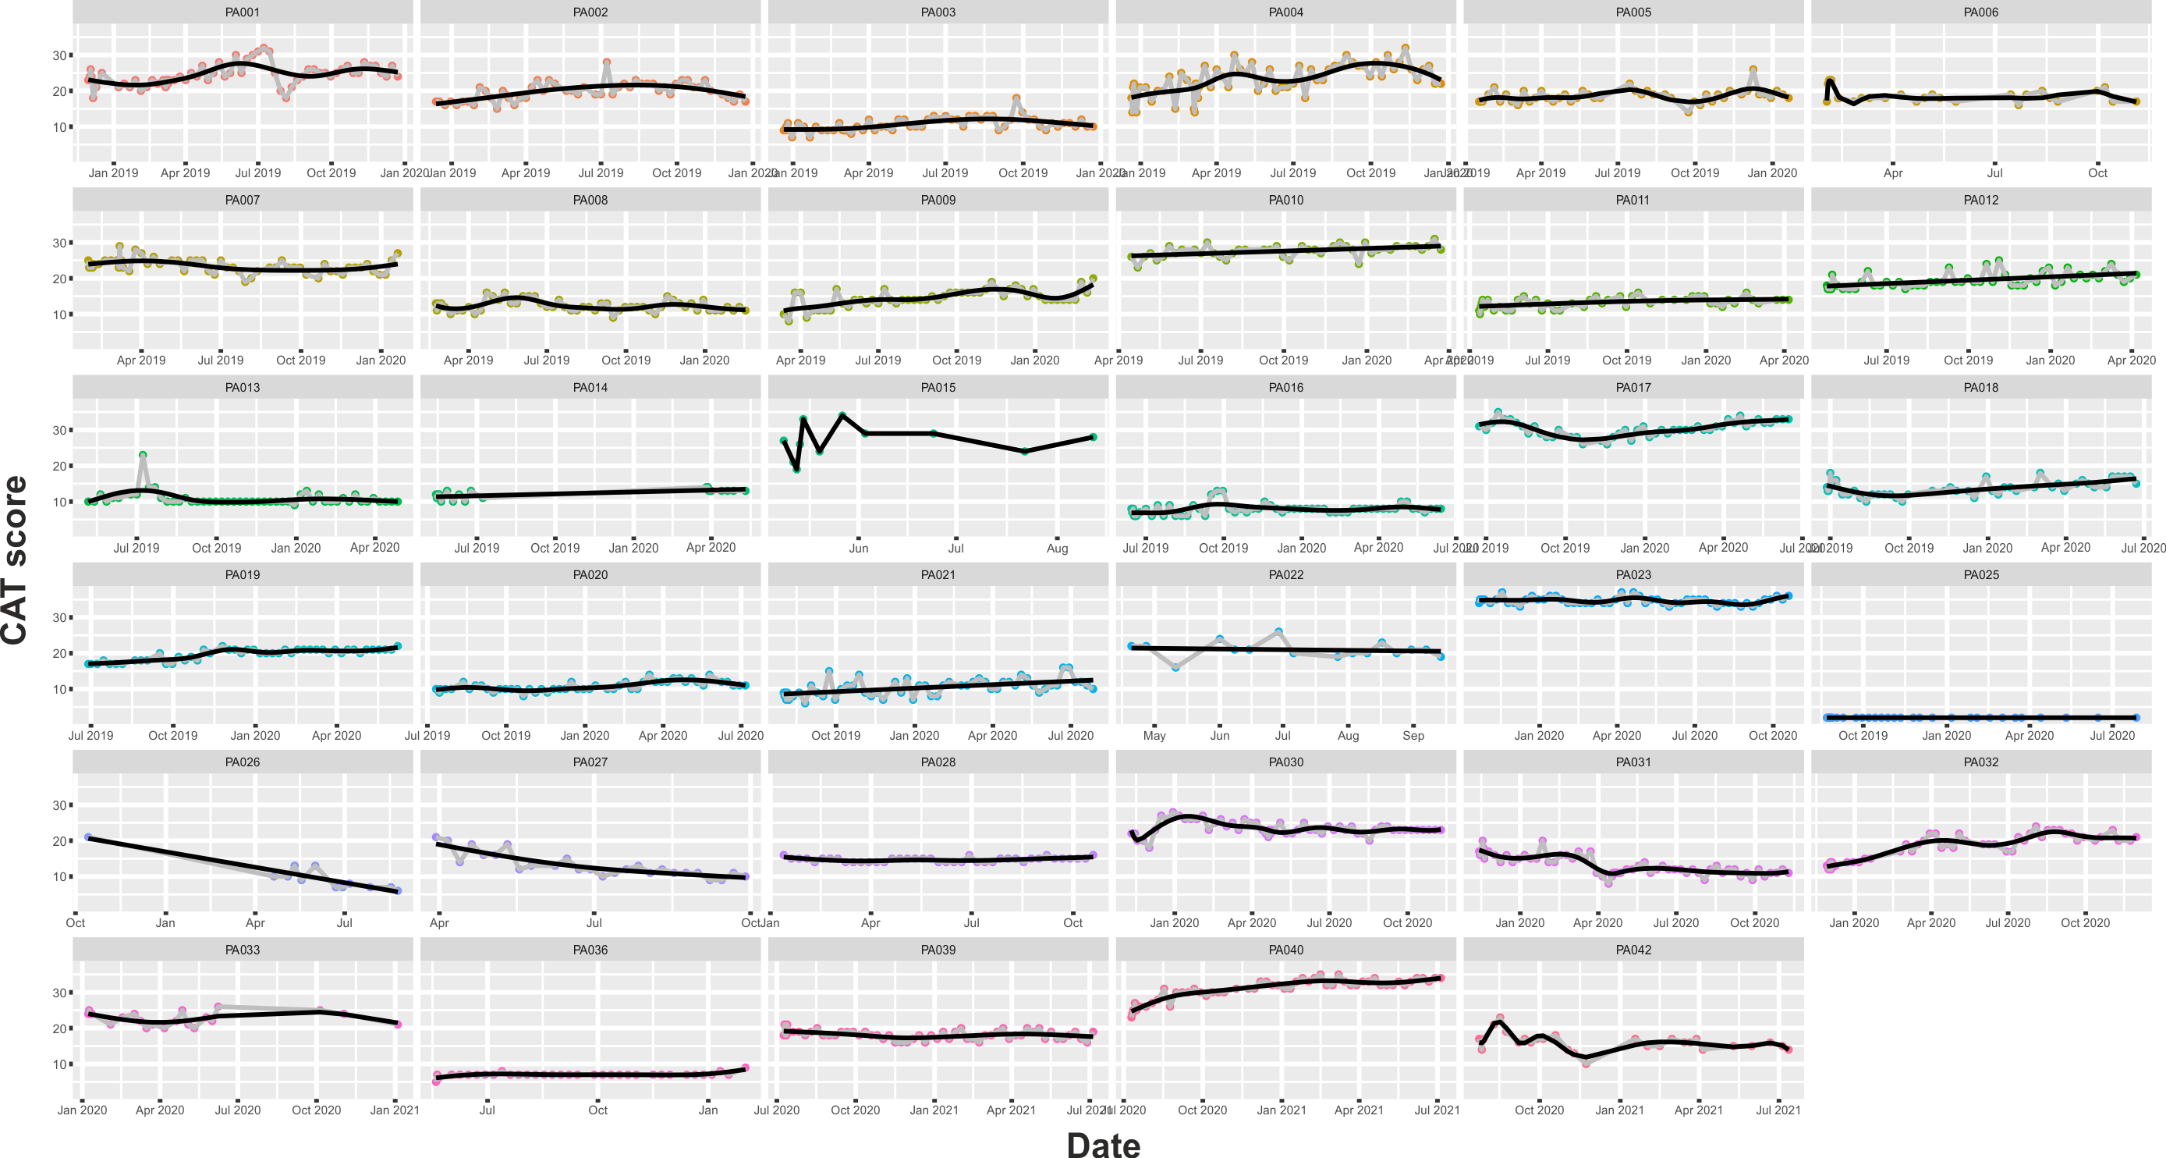

Supplement: Supplementary file 1 [file get_supplementary_file.php]
